# Supplementary material
Source: PubMed Central journal article supplement (PMC9945839)
Supplement: 41586_2023_5736_MOESM1_ESM.pdf [file 41586_2023_5736_MOESM1_ESM.pdf]

---

**Supplementary information**

---

**Autoimmunity in Down's syndrome via  
cytokines, CD4 T cells and CD11c<sup>+</sup> B cells**

---

In the format provided by the  
authors and unedited

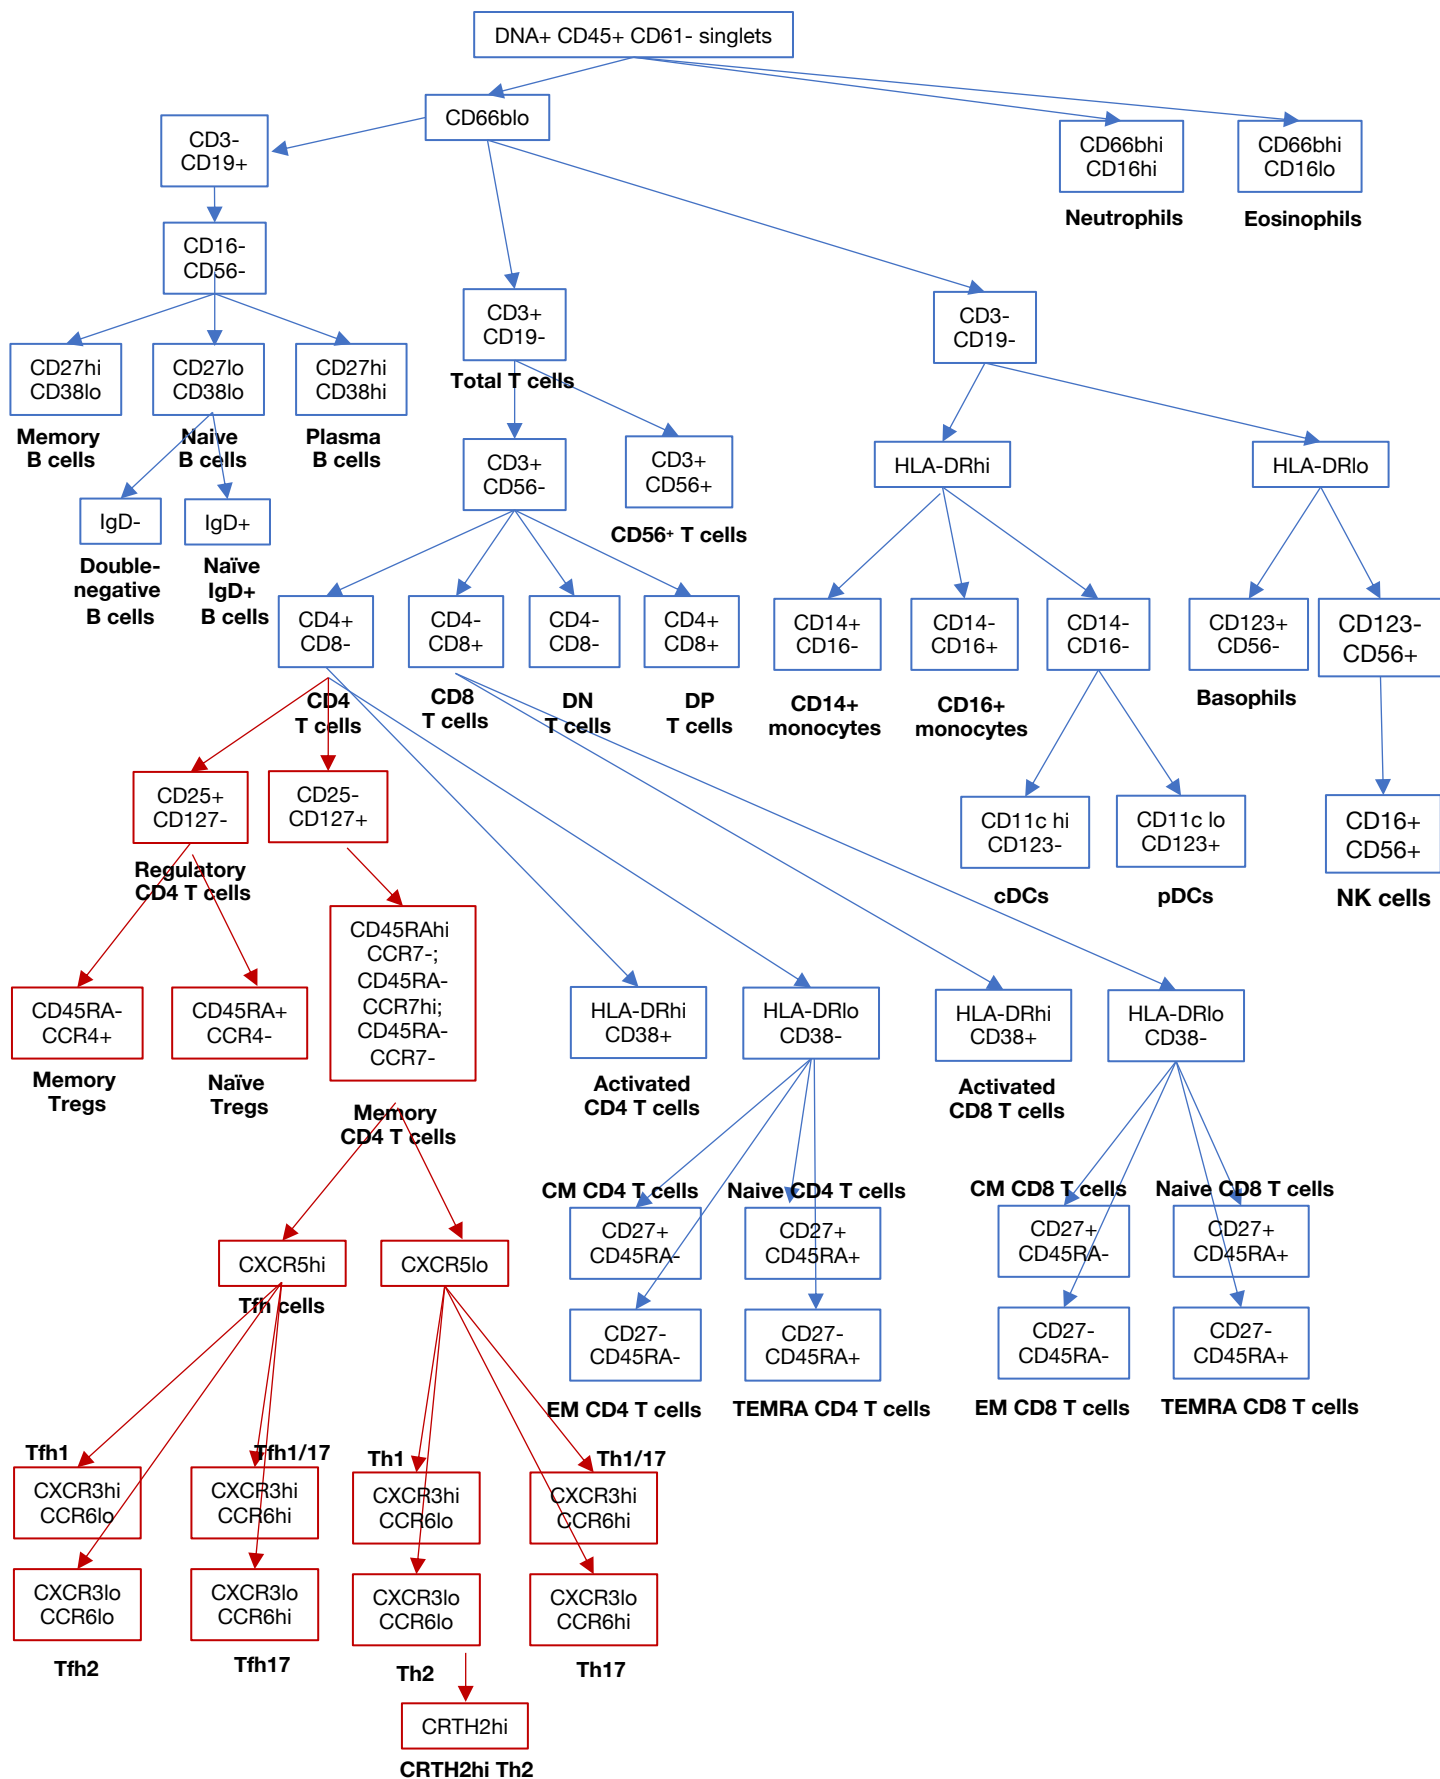

**Supplementary Figure 1. Schematic of the gating hierarchy used to define immune populations by mass cytometry.** Red boxes denote populations that were only resolved with the MDIPA staining protocol. Blue populations were resolved with both MDIPA staining and post-fixing extracellular staining protocols.
